# Supplementary material for: Frequency of CXCR3+ CD8+ T-Lymphocyte Subsets in Peripheral Blood Is Associated With the Risk of Paradoxical Tuberculosis-Associated Immune Reconstitution Inflammatory Syndrome Development in Advanced HIV Disease
Source: PubMed Central journal article supplement (PMC9011055; doi:10.3389/fimmu.2022.873985), 2022-04-01
Supplement: DataSheet_1.pdf [file DataSheet_1.pdf]

**Supplementary Table 1. Characteristics of the study participants**

| <b>Patient characteristics</b>                                  | <b>Non Tb IRIS (N =25)</b> | <b>TB-IRIS (N= 31)</b> | <b>p-value</b>    |
|-----------------------------------------------------------------|----------------------------|------------------------|-------------------|
| <b>Male Gender - n (%)</b>                                      | 20 (80%)                   | 18 (58%)               | 0.735             |
| <b>Median Age - years (IQR)</b>                                 | 37 (31-40)                 | 36 (27-46)             | 0.967             |
| <b>Median BMI -Kg/m<sup>2</sup> (IQR)</b>                       | 40.5 (35.7-46.5)           | 42.0 (36.0-48.0)       | 0.732             |
| <b>Median Time to ART - days (IQR)</b>                          | 43 (23-68)                 | 20 (14-30)             | <b>&lt; 0.001</b> |
| <b>Hematologic characteristics</b>                              |                            |                        |                   |
| <b>CD4<sup>+</sup> T lymphocytes/μL – median (IQR)</b>          | 156 (89-264)               | 93 (39- 135)           | <b>0.005</b>      |
| <b>CD8<sup>+</sup> T lymphocytes/μL – median (IQR)</b>          | 459 (297 -727)             | 765 (311 -1095)        | 0.109             |
| <b>HIV RNA copies – median log<sub>10</sub>/mL plasma (IQR)</b> | 5.3 (4.5 -5.6)             | 5.9 (5.4 – 5.9)        | <b>&lt; 0.001</b> |

**Table Note:** Data represent no (%) of participants unless otherwise indicated. Data were compared using the Mann Whitney U test (continuous variables) or the Fisher's exact test. IQR=interquartile range; BMI=body mass index; ART=antiretroviral therapy

**Supplementary Table 2. Antibody Panel**

| Marker | Fluorochrome | Clone     | Manufacturer    | Catalogue # |
|--------|--------------|-----------|-----------------|-------------|
| CD3    | APC-Cy™7     | SK7       | BD<br>pharmigen | 557832      |
| CD4    | Pacific Blue | RM4-5     | ebioscience     | MCD0428TR   |
| CD8    | Qdot 605     | 3B5       | Invitrogen      | Q10009      |
| CD45RO | Pe-Cy5       | UCHL1     | ebioscience     | 15-0457-73  |
| CD27   | FITC         | M-T271    | BD<br>pharmigen | 555440      |
| CCR6   | Pe           | 11A9      | BD<br>pharmigen | 559562      |
| CXCR3  | APC          | 1C6/CXCR3 | BD<br>pharmigen | 550967      |

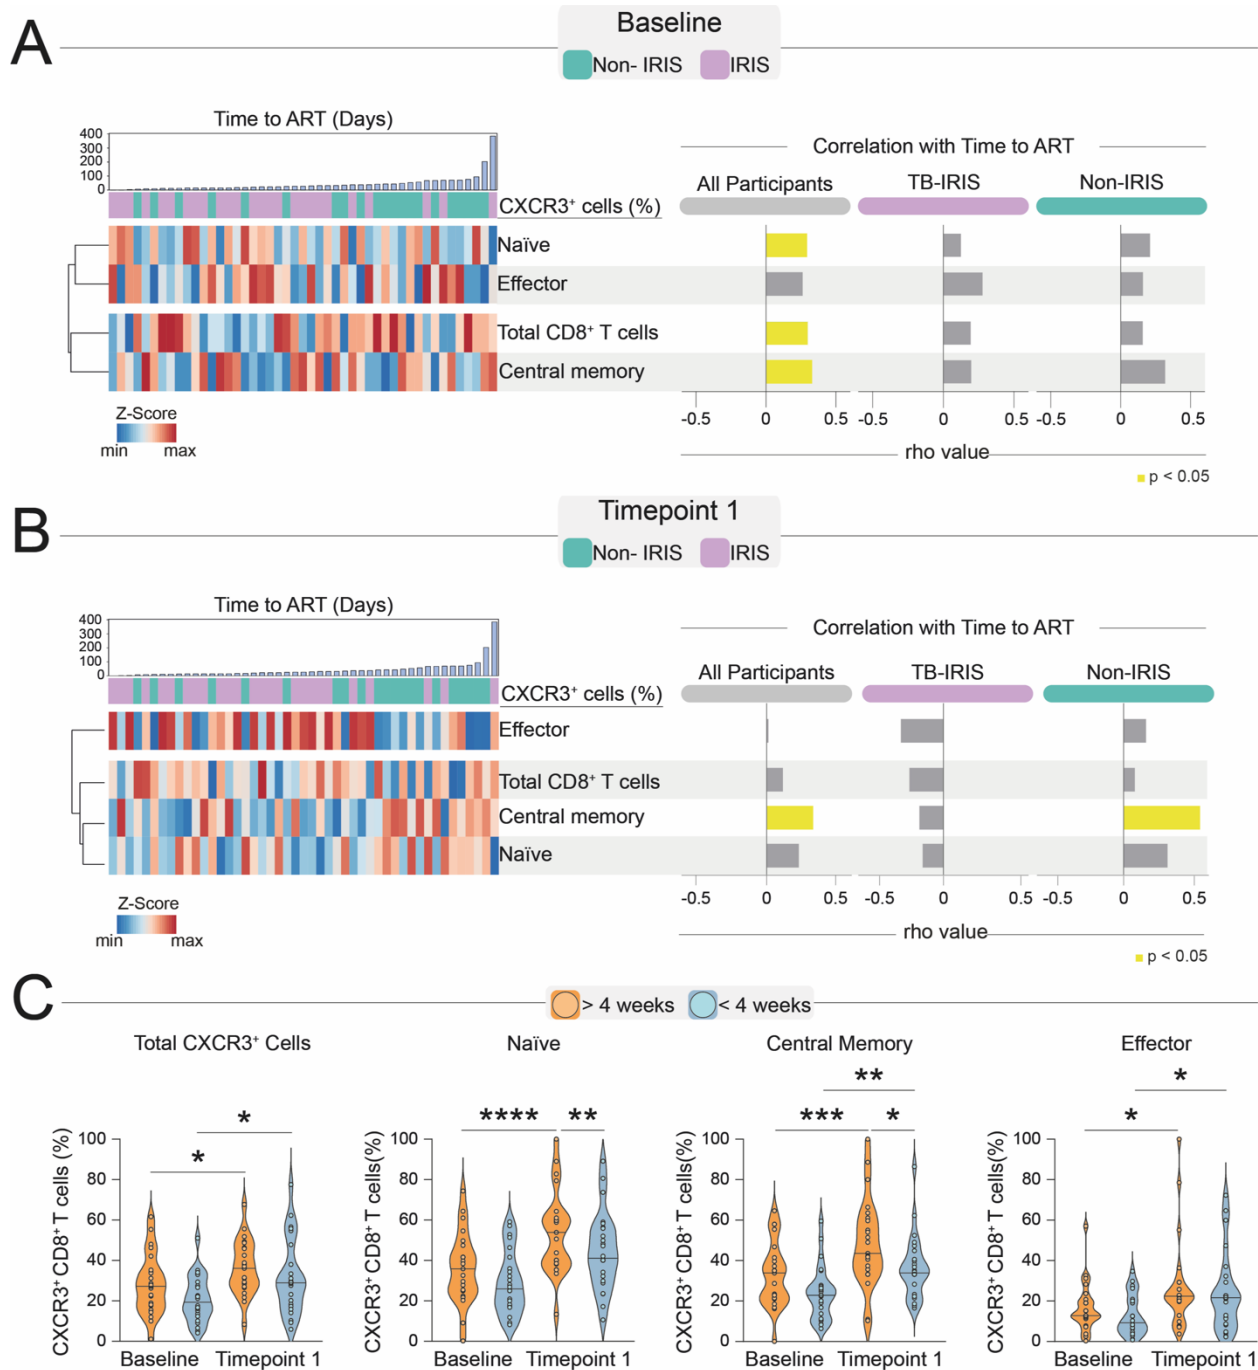

**Supplementary Figure 1 - Expression of CXCR3<sup>+</sup> in memory CD8<sup>+</sup> T cells from patients that initiated ART with more or less than 4 weeks difference from ATT initiation.** We employed a hierarchical cluster analysis of z-score normalized values of CXCR3<sup>+</sup> memory CD8<sup>+</sup> T lymphocytes at Baseline (A) and at timepoint 1 (B). The right panel depicts Spearman correlation coefficient values between time from ATT to ART initiation vs. the frequency of indicated parameters. (C) Violin plots represent the frequencies of each CXCR3<sup>+</sup> memory CD8<sup>+</sup> T cell in our study groups. Data were analyzed using the Mann-Whitney test or Wilcoxon matched-pairs test for paired analyses within each study group (\*\*p < 0.01, \*\*\*\*p < 0.0001).
